# Supplementary material
Source: PubMed Central journal article supplement (PMC7985968)
Supplement: NIHMS1674493-supplement-Supp_Figures.pdf [file NIHMS1674493-supplement-Supp_Figures.pdf]

## Tal et al. Supplementary Data

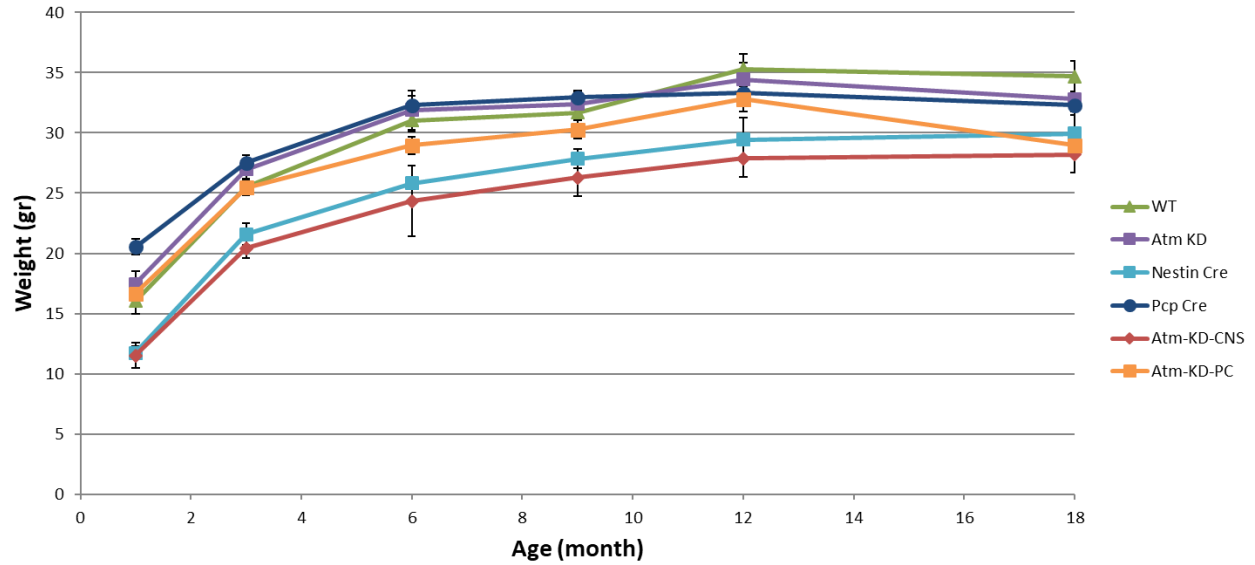

**Supplementary Figure 1. Nestin promoter-driven expression of the Cre recombinase is associated with decreased body weight.** Body weight measurements of mice with different genotypes: *Atm*-KD-CNS (n=7), *Atm*-KD-PC (n=9), WT (n=14), *Atm*<sup>+/*KD*</sup> (n=10), Nestin-Cre (n=8), Pcp-Cre (n=10). Standard errors are shown.

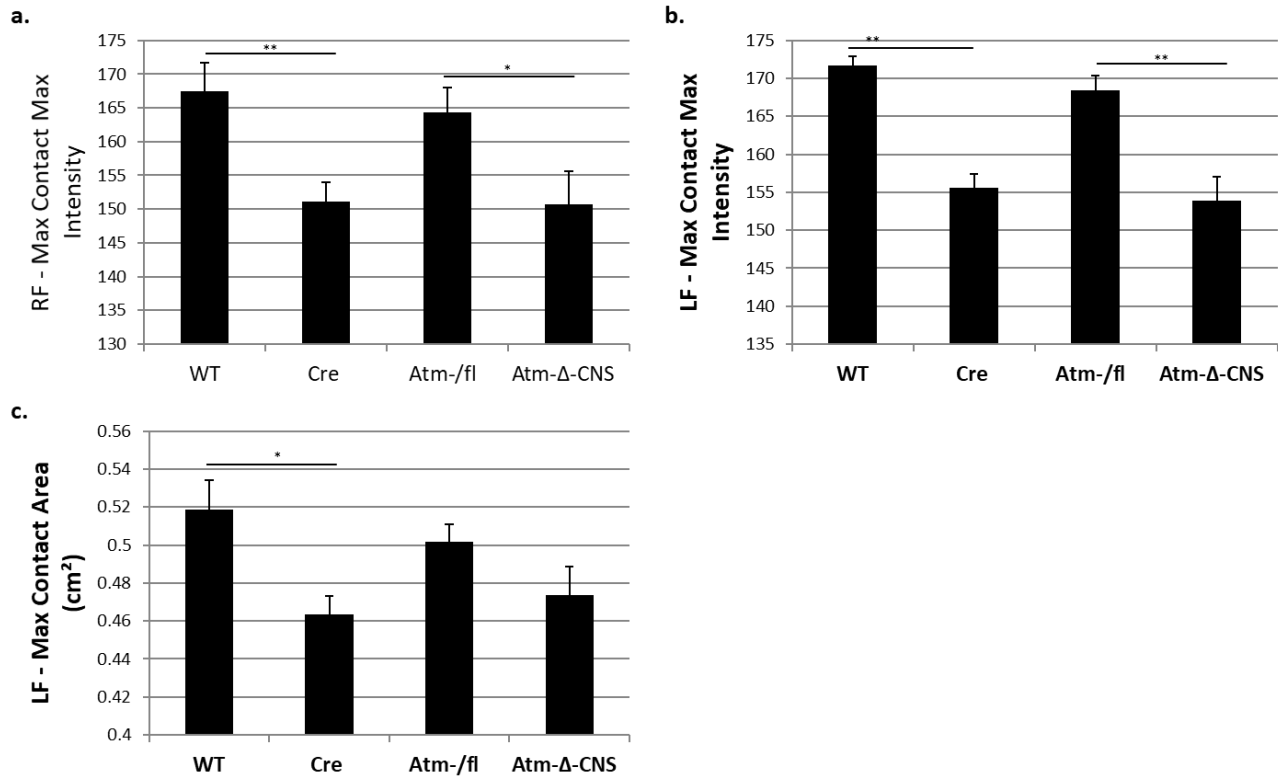

**Supplementary Figure 2. Gait analysis using the CatWalk XT system in different genotypes.** Mice were introduced to the CatWalk at the age of 12 months. Their gait was recorded, and different gait parameters were quantified and analyzed: **a.** Maximal intensity of the right front paw at the time of maximal contact with the surface, **b.** Maximal contact area of the left front paw with the surface. **c.** Maximal intensity for the left front paw at the time of maximal contact with the surface. WT (n=10), Nestin-Cre (n=9), *Atm*<sup>-fl</sup> (n=9), Nestin Cre/*Atm*<sup>-fl</sup> (n=9). Statistical significance was determined using Bonferroni correction for post hoc analysis in ANOVA. \*p<0.05, \*\*p<0.01, \*\*\*p<0.001.
